# Supplementary material
Source: PubMed Central journal article supplement (PMC4720039)
Supplement: ibmk_a_1094133_sm2729.pdf [file ibmk_a_1094133_sm2729.pdf]

## Supplemental Tables

**Switching from usual brand cigarettes to a tobacco-heating cigarette or snus: Part 1.**

| <b>Supplemental Table 1. Smoke chemistry data for study cigarettes<sup>a</sup></b> |                |                        |                          |                          |
|------------------------------------------------------------------------------------|----------------|------------------------|--------------------------|--------------------------|
| <b>CFM Method Measures<sup>b</sup></b>                                             | <b>Eclipse</b> | <b>Eclipse Menthol</b> | <b>Camel Ultra Light</b> | <b>Salem Ultra Light</b> |
| 'Tar' (mg/cig)                                                                     | 4.8 (0.5)      | 4.5 (0.5)              | 4.7 (0.2)                | 5.3 (0.2)                |
| Nicotine (mg/cig)                                                                  | 0.23 (0.02)    | 0.20 (0.02)            | 0.42 (0.01)              | 0.45 (0.03)              |
| Carbon monoxide (mg/cig)                                                           | 3.6 (0.2)      | 3.6 (0.2)              | 6.3 (0.3)                | 7.2 (0.4)                |
| Acrolein (µg/cig)                                                                  | 26.4 (2.4)     | 27.3 (2.5)             | 29.5 (1.2)               | 30.6 (1.7)               |
| Crotonaldehyde (µg/cig)                                                            | 8.1 (0.5)      | 7.9 (0.8)              | 6.1 (0.5)                | 6.2 (0.4)                |
| 2-Aminonaphthalene (ng/cig)                                                        | 0.67 (0.05)    | 0.58 (0.04)            | 4.9 (0.3)                | 4.7 (0.3)                |
| 4-Aminobiphenyl (ng/cig)                                                           | 0.18 (0.01)    | 0.15 (0.01)            | 0.85 (0.03)              | 0.82 (0.03)              |
| NNN (ng/cig)                                                                       | 9.2 (0.8)      | 9.3 (1.0)              | 45.2 (2.6)               | 38.8 (1.5)               |
| NNK (ng/cig)                                                                       | 15.2 (0.8)     | 14.5 (1.4)             | 27.7 (2.0)               | 26.3 (2.0)               |
| Benzo(a)pyrene (ng/cig)                                                            | 2.4 (0.3)      | 2.4 (0.4)              | 3.6 (0.4)                | 4.0 (0.5)                |
| Benzene (µg/cig)                                                                   | 11.5 (2.3)     | 11.8 (2.6)             | 24.7 (1.7)               | 26.6 (1.6)               |
| 1,3-Butadiene (µg/cig)                                                             | 6.2 (0.3)      | 5.5 (0.5)              | 21.4 (0.7)               | 26.2 (1.1)               |
| Acrylamide (µg/cig)                                                                | <0.12          | <0.12                  | 0.80 (0.08)              | 1.08 (0.09)              |

<sup>a</sup>Smoke generated for analysis by the Cambridge Filter Method (CFM) (FTC, 1967; 1980)  
<sup>b</sup>Analyte mean (standard deviation); n=8 for 'tar', nicotine, and carbon monoxide; n=6 otherwise

| <b>Supplemental Table 2. Quality assurance data for study snus</b> |                          |                          |                            |
|--------------------------------------------------------------------|--------------------------|--------------------------|----------------------------|
| <b>Measures<sup>a</sup></b>                                        | <b>Camel SNUS Frost</b>  | <b>Camel SNUS Spice</b>  | <b>Camel SNUS Original</b> |
| pH                                                                 | 7.45 – 7.84 (7.55; 0.16) | 7.33 – 7.85 (7.54; 0.23) | 7.62 – 7.82 (7.73; 0.08)   |
| Moisture (%)                                                       | 32.2 – 34.4 (33.4; 0.9)  | 31.9 – 34.5 (33.3; 1.0)  | 32.7 – 33.1 (33.0; 0.2)    |
| Nicotine (%) <sup>b</sup>                                          | 1.45 – 1.60 (1.52; 0.07) | 1.29 – 1.76 (1.53; 0.20) | 1.18 – 1.56 (1.35; 0.16)   |

<sup>a</sup>Analyte range (mean; standard deviation) across the 5 snus lots used in the study  
<sup>b</sup>As-is (i.e. "wet") basis

| <b>Supplemental Table 3. Representative product chemistry data for study snus<sup>a</sup></b> |                         |                         |                            |
|-----------------------------------------------------------------------------------------------|-------------------------|-------------------------|----------------------------|
| <b>Measures<sup>b</sup></b>                                                                   | <b>Camel SNUS Frost</b> | <b>Camel SNUS Spice</b> | <b>Camel SNUS Original</b> |
| pH                                                                                            | 7.72 (0.02)             | 7.81 (0.02)             | 7.95 (0.03)                |
| Moisture (%)                                                                                  | 32.2 (0.1)              | 32.2 (0.5)              | 31.9 (0.6)                 |
| Nicotine (mg/g) <sup>c</sup>                                                                  | 14.1 (0.11)             | 13.4 (0.62)             | 13.5 (0.29)                |
| NNN (ng/g)                                                                                    | 1009 (38)               | 984 (5)                 | 1082 (24)                  |
| NAT (ng/g)                                                                                    | 874 (13)                | 824 (19)                | 964 (50)                   |
| NAB (ng/g)                                                                                    | 75 (32)                 | 68 (31)                 | 100 (22)                   |
| NNK (ng/g)                                                                                    | 345 (52)                | 250 (19)                | 322 (22)                   |
| Benzo(a)pyrene (ng/g)                                                                         | 1.9 (0.2)               | 1.8 (0.1)               | 1.3 (0.1)                  |

<sup>a</sup>Selected market survey data adapted from Borgerding et al. (2012) for Camel SNUS purchased at retail, April-June 2007  
<sup>b</sup>Analyte mean (standard deviation), n=3; all values expressed on a dry-weight basis unless otherwise noted  
<sup>c</sup>As-is (i.e. "wet") basis
